# Supplementary material for: Inverse analysis-guided development of acid-tolerant nanoporous high-entropy alloy catalysts for enhanced water-splitting performance
Source: Royal Society of Chemistry journal article supplement (doi:10.1039/d4ta05756b), 2024-11-15
Supplement: d4ta05756b1.pdf [file d4ta05756b1.pdf]

## Supporting Information

# Inverse analysis-guided development of acid-tolerant nanoporous high-entropy alloy catalysts for enhanced water-splitting performance

Saikat Bolar,<sup>a</sup> Chunyu Yuan,<sup>a</sup> Samuel Jeong,<sup>b</sup> Yoshikazu Ito<sup>b</sup> and Takeshi Fujita <sup>\*a</sup>

<sup>a</sup> School of Engineering Science, Kochi University of Technology, 185 Miyanokuchi, Tosayamada, Kami City, Kochi 782-8502, Japan

<sup>b</sup> Institute of Applied Physics, Graduate School of Pure and Applied Sciences, University of Tsukuba, Tsukuba 305-8573, Japan

\*E-mail: fujita.takeshi@kochi-tech.ac.jp

### Experimental procedures for membrane electrode assembly

#### 1. 1 Preparation of catalyst inks and fabrication of membrane electrode assembly for Pt/C||IrO<sub>2</sub>

A 1.0 cm<sup>2</sup> Pt/C||IrO<sub>2</sub> membrane electrode assembly was prepared using a conventional spray-coating method. A homogeneous ink for the cathode catalyst layer was prepared from Pt/C (10 mg), Nafion™ solution (54 μL), and isopropyl alcohol/water solution (1.8:0.2 mL). The ink was sonicated for 10 min and then spray-coated onto a preheated (120 °C) Nafion®117 membrane (front side; area: 1.0 cm<sup>2</sup>) to form the cathode catalyst layer (catalyst loading: 1.0 mg cm<sup>-2</sup>). Next, a homogeneous ink for the anode catalyst layer was prepared from IrO<sub>2</sub> (10 mg), Nafion™ solution (25 μL), and isopropyl alcohol/water solution (1.5:1.5 mL). The ink was sonicated for 30 min and then spray-coated onto the preheated (120 °C) Nafion®117 membrane (back side) to form the anode catalyst layer (catalyst loading: 1.0 mg cm<sup>-2</sup>). Finally, a 1.0 cm<sup>2</sup> piece of carbon paper (GDL 22 BB, SIGRACET) was hot-pressed onto the cathode catalyst layer at 130 °C and 5.0 MPa for 1 min to form the cathode gas diffusion layer.

#### 1.2 Preparation of catalyst inks and fabrication of membrane electrode assembly for HEA8||IrO<sub>2</sub>

A 1.0 cm<sup>2</sup> HEA8||IrO<sub>2</sub> membrane electrode assembly was prepared using a similar spray-coating method. The homogeneous ink for the cathode catalyst layer comprised as-synthesized HEA8 (20 mg), Nafion™ solution (40 μL), and isopropyl alcohol/water solution (1:1 mL). The ink was sonicated for 30 min and then spray-coated onto a preheated (120 °C) Nafion®117 membrane (front side; area: 1.0 cm<sup>2</sup>) to form the cathode catalyst layer (catalyst loading: 0.85 mg cm<sup>-2</sup>) (Pt base). The homogeneous ink for the anode catalyst layer was the same as that for the Pt/C||IrO<sub>2</sub> assembly. The ink was sonicated for 30 min and then spray-deposited onto the preheated (120 °C) Nafion®117 membrane (back side) to form the anode catalyst layer (catalyst loading: 1.5 mg cm<sup>-2</sup>). Finally, 1.0 cm<sup>2</sup> piece of carbon paper was hot-pressed onto the cathode catalyst layer at 130 °C and 5.0 MPa for 1 min to form the cathode gas diffusion layer.

### **1.3 Preparation of catalyst inks and fabrication of membrane electrode assembly for Pt/C||HEA8**

A 1.0 cm<sup>2</sup> Pt/C||HEA8 membrane electrode assembly was prepared using a similar spray-coating method. A homogeneous Pt/C ink was prepared as for the Pt/C||IrO<sub>2</sub> assembly and then spray-coated onto a preheated (120 °C) Nafion®117 membrane (front side; area: 1.0 cm<sup>2</sup>) to form the cathode catalyst layer (catalyst loading: 1.0 mg cm<sup>-2</sup>). A homogeneous ink for the anode catalyst layer was prepared from as-synthesized HEA8 (20 mg), Nafion™ solution (40 μL), and isopropyl alcohol/water solution (1:1 mL). The ink was sonicated for 30 min and then spray-coated onto a preheated (120 °C) Pt-plated Ti mesh (i.e., porous transport layer) to form the anode catalyst layer (catalyst loading: 0.85 mg cm<sup>-2</sup>) (Pt base). A 1.0 cm<sup>2</sup> piece of carbon paper was hot-pressed onto the cathode catalyst layer on the Nafion®117 membrane at 130 °C and 5.0 MPa for 1 min to form the cathode gas diffusion layer. Subsequently, the porous transport layer was joined with the membrane in the cell.

### **1.4 Electrolyzer cell setup**

A standard electrolyzer cell (YNU standard cell) was employed for the proton exchange membrane (PEM) test. The membrane electrode assembly (gas diffusion layer + Nafion®117) was placed between the flow fields with a porous transport layer on the anode. Two gaskets (thickness: 160 μm each) were placed on the anode side and one gasket (thickness: 160 μm) was placed on the cathode side for sealing and insulation. The membrane electrode assembly was then pressed at 3 MPa.

### **1.5 Cell testing**

Single-cell tests were performed using a potentiostat (VSP-300, Biologic) equipped with a booster unit (10 A). All measurements were performed at a cell temperature of 80 °C under ambient pressure. Deionized water (18.2 MΩ cm, Millipore) was preheated at 90 °C and fed to the anode side of the cell at a water flow rate of 10 mL min<sup>-1</sup>. After the cell temperature was stabilized at 80 °C, the cell was conditioned by ramping the

current density to  $3.0 \text{ A cm}^{-2}$  and holding the current density for 3 h for cell activation. Subsequently, stable current–voltage ( $I$ – $V$ ) polarization curves were recorded from 0 to  $5.0 \text{ A cm}^{-2}$  at a scan rate of  $10 \text{ mV s}^{-1}$ . Chronoamperometry was performed for 100 h at a cell voltage of 1.57 V for HEA||IrO<sub>2</sub>, 1.70 V for Pt/C||HEA8, and 1.65 V for Pt/C||IrO<sub>2</sub>.

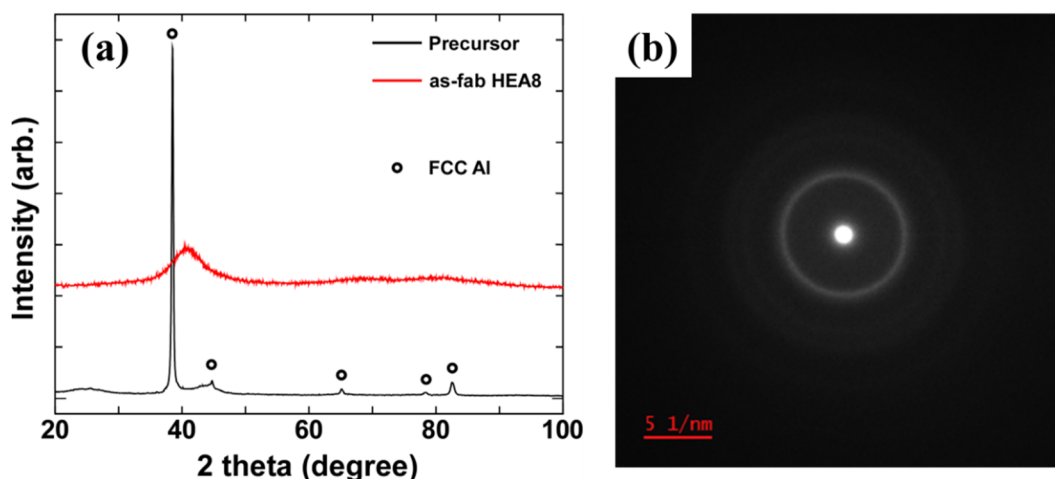

**Figure S1.** (a) XRD patterns of the as-fabricated HEA8 alloy and as-prepared Al-alloy precursor ribbons. (b) Selected area electron diffraction pattern of HEA8.

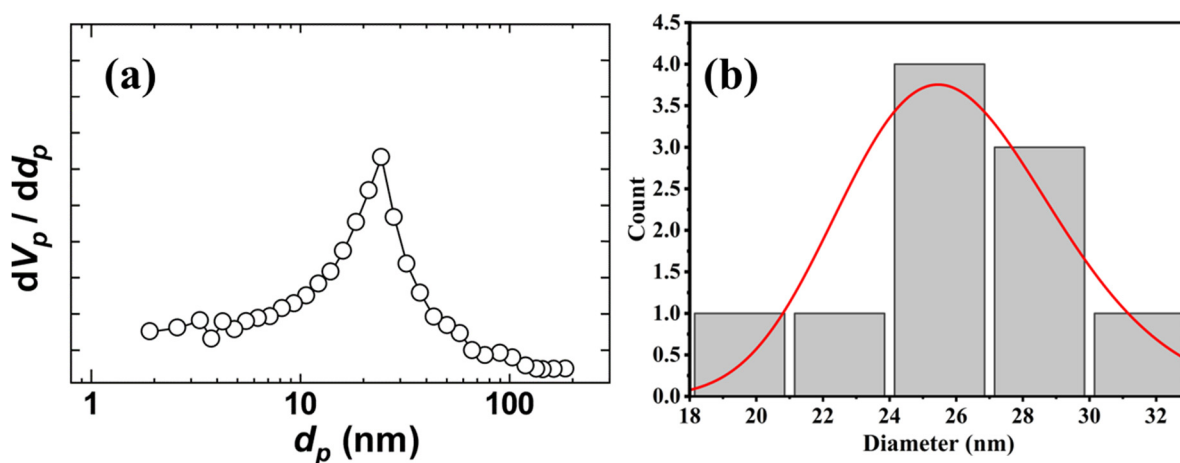

**Figure S2.** (a) Barrett–Joyner–Halenda (BJH) pore size distribution of HEA8, displaying hierarchical distribution with a broad peak corresponding to pores in the range of  $\sim 20$ – $30$  nm. (b) Particle diameter histogram obtained from TEM observations (Figure S3a), showing consistency with the BJH pore size distribution.

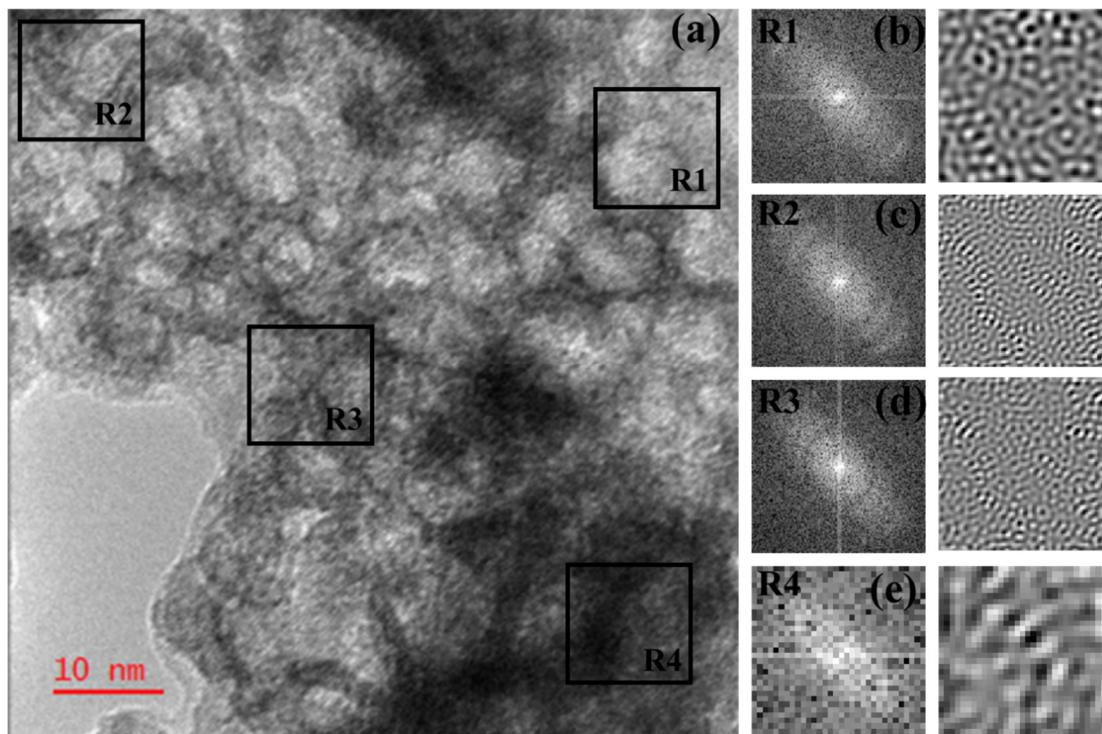

**Figure S3.** (a) TEM image of HEA8 and (b–e) fast Fourier transform and inverse fast Fourier transform patterns at different regions (R1–R4). The broadened and diffuse spots indicate nonuniform atomic positions and distorted lattice planes.

**Table S1.** ICP analysis of HEA8, with the sum of the analyzed elements set to 100%.

| Element | Atomic percent (%) |
|---------|--------------------|
| Al      | 27.7               |
| Pt      | 13.3               |
| Rh      | 12.3               |
| Ir      | 13.5               |
| Au      | 14.7               |
| Ru      | 13.2               |
| Nb      | 2.6                |
| Ta      | 2.6                |

**Table S2.** Recently reported electrocatalysts for the hydrogen evolution reaction (HER) in acidic media.

| Electrocatalyst                                              | Overpotential ( $\eta_{10}$ ) | Tafel Slope ( $\text{mV dec}^{-1}$ ) | Ref.      |
|--------------------------------------------------------------|-------------------------------|--------------------------------------|-----------|
| $\text{Mo}_{0.58}\text{V}_{0.26}\text{Nb}_{0.16}\text{Se}_2$ | 80                            | 55                                   | 1         |
| $\text{Nb}_{0.7}\text{V}_{0.3}\text{Se}_2$                   | 236                           | 72                                   | 2         |
| PtFeCoNiCuHEA                                                | 10.8                          | 28.1                                 | 3         |
| PtSA/NT/NF                                                   | 24                            | 30                                   | 4         |
| ALDPt/NGNs                                                   | 48                            | 29                                   | 5         |
| $\text{Mo}_2\text{TiC}_2\text{T}_x\text{-PtSA}$              | 30                            | 30                                   | 6         |
| Pt/np- $\text{Co}_{0.85}\text{Se}$                           | 55                            | 35                                   | 7         |
| PbPtCuNiP                                                    | 62                            | 44.6                                 | 8         |
| $\text{K}_2\text{PtCl}_4/\text{NC}$                          | 11                            | 21                                   | 9         |
| Pt/MC                                                        | 27.3                          | 26                                   | 10        |
| AL-Pt/Pd <sub>3</sub> Pb                                     | 13.8                          | 18                                   | 11        |
| M- $\text{CoSe}_{1.28}\text{S}_{0.72}$                       | 67                            | 50                                   | 12        |
| HEA8                                                         | 41                            | 87.2                                 | This work |

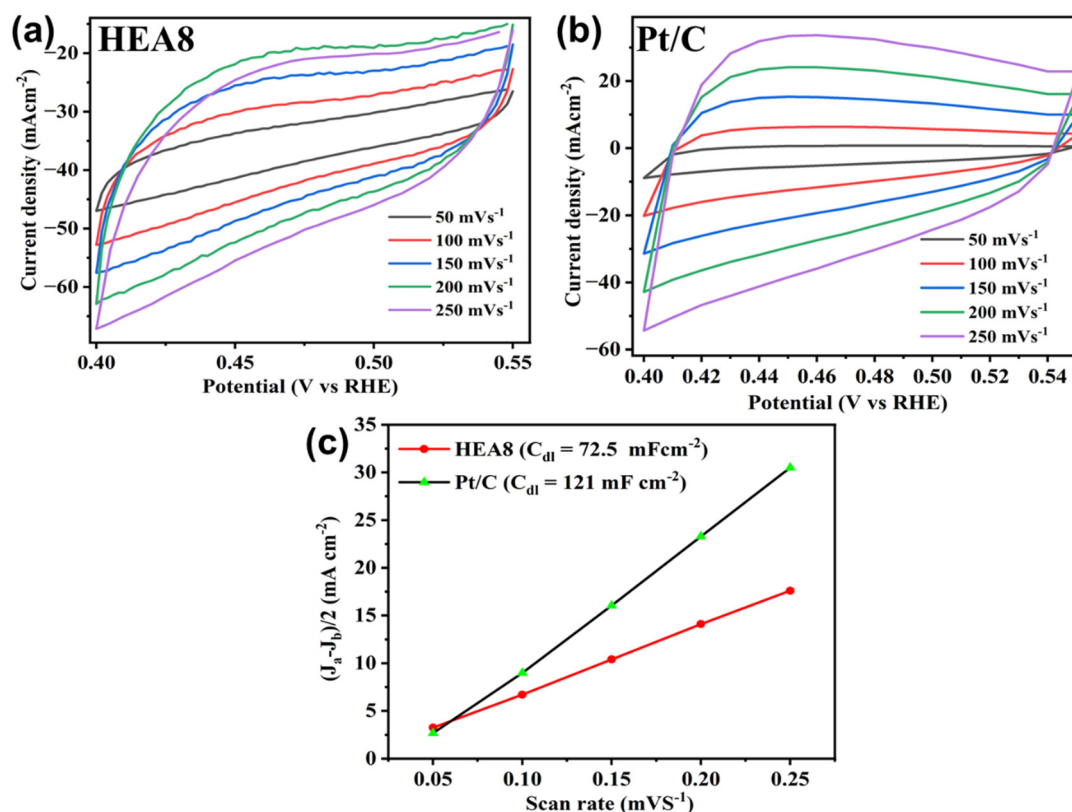

**Figure S4.** Cyclic voltammograms and electrochemically active surface areas (ESCs) of HEA8 and Pt/C for the HER.

**Table S3.** Tafel slope ( $b$ ), intercept ( $a$ ), and exchange current density ( $j_0$ ) related to the HER catalyzed by different materials.

| Electrocatalyst | Steady-state region |                             |                              |
|-----------------|---------------------|-----------------------------|------------------------------|
|                 | $a$                 | $b$ (mV dec <sup>-1</sup> ) | $j_0$ (mA cm <sup>-2</sup> ) |
| HEA8            | -0.05548            | 87.2                        | 4.16                         |
| Pt/C            | -0.01131            | 67.5                        | 1.69                         |

**Table S4.** Calculated double-layer capacitance ( $C_{dl}$ ), ECSA, and roughness factor (RF).

| Catalyst | $C_{dl}$ (mFcm <sup>-2</sup> ) | ECSA (cm <sup>2</sup> ) | RF    |
|----------|--------------------------------|-------------------------|-------|
| HEA8     | 78.5                           | 2242.28                 | 56057 |
| Pt/C     | 121                            | 3457.14                 | 86425 |

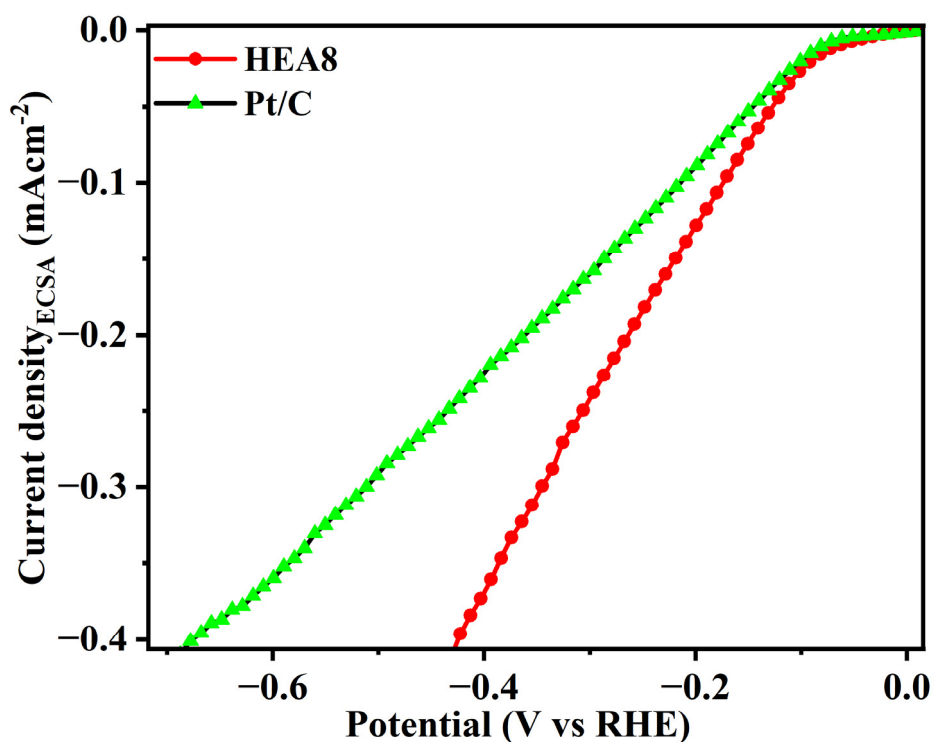

**Figure S5.** ECSA-normalized linear sweep voltammograms of HEA8 and Pt/C.

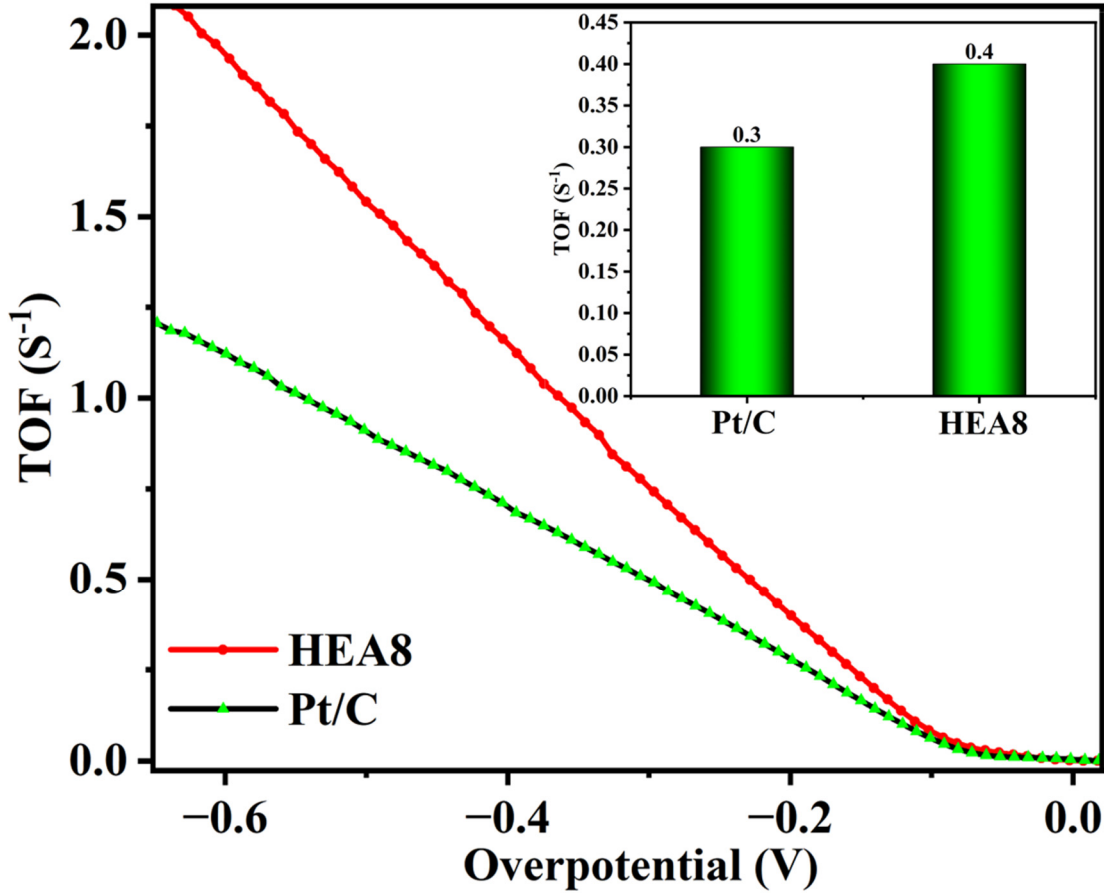

**Figure S6.** Turnover frequencies (TOFs) for the investigated HER electrocatalysts (inset: comparison of TOFs for HEA8 and Pt/C at an overpotential of 200 mV).

### TOF calculation for the HER

The method proposed by Jaramillo et al. was adopted for calculating the TOF.<sup>13,14</sup> The TOF was determined using the following equation:

$$\text{TOF per site} = \# \times J \times A / N \times A$$

where # represents the number of hydrogen turnover events,  $J$  is the current density at an applied overpotential,  $A$  is the geometric area of the catalyst, and  $N$  is the number of active sites per unit area. The total number of hydrogens turnovers ( $\#H_2$ ) was calculated from the current density:

$$\#H_2 = (j \text{ mA cm}^{-2}) \times (1 \text{ C s}^{-1}/1000 \text{ mA}) \times (1 \text{ mol e}^{-1}/96485 \text{ C}) \times (1 \text{ mol H}_2/2 \text{ mol e}^{-1}) \times (6.023 \times 10^{23} \text{ molecules H}_2/1 \text{ mol H}_2) = 3.12 \times 10^{15} \text{ H}_2 \text{ s}^{-1} \text{ cm}^{-2} \text{ per mA cm}^{-2}$$

In this work, # is  $3.12 \times 10^{15} \text{ s}^{-1} \text{ cm}^{-2}$  per  $\text{mA cm}^{-2}$ , and  $A$  is  $0.04 \text{ cm}^2$ , corresponding to the geometric area of the catalyst. The surface site density of all materials is reasonably approximated to be  $10^{15} \text{ cm}^{-2}$ . Therefore,  $N$  can be calculated through the formula  $N =$

$C_{dl}/C_s \times 10^{15} \text{ cm}^{-2}$ , where  $C_{dl}$  and  $C_s$  represent the double-layer and specific capacitance, respectively. For this calculation, a general  $C_s$  value of  $0.035 \text{ mF cm}^{-2}$  was used.

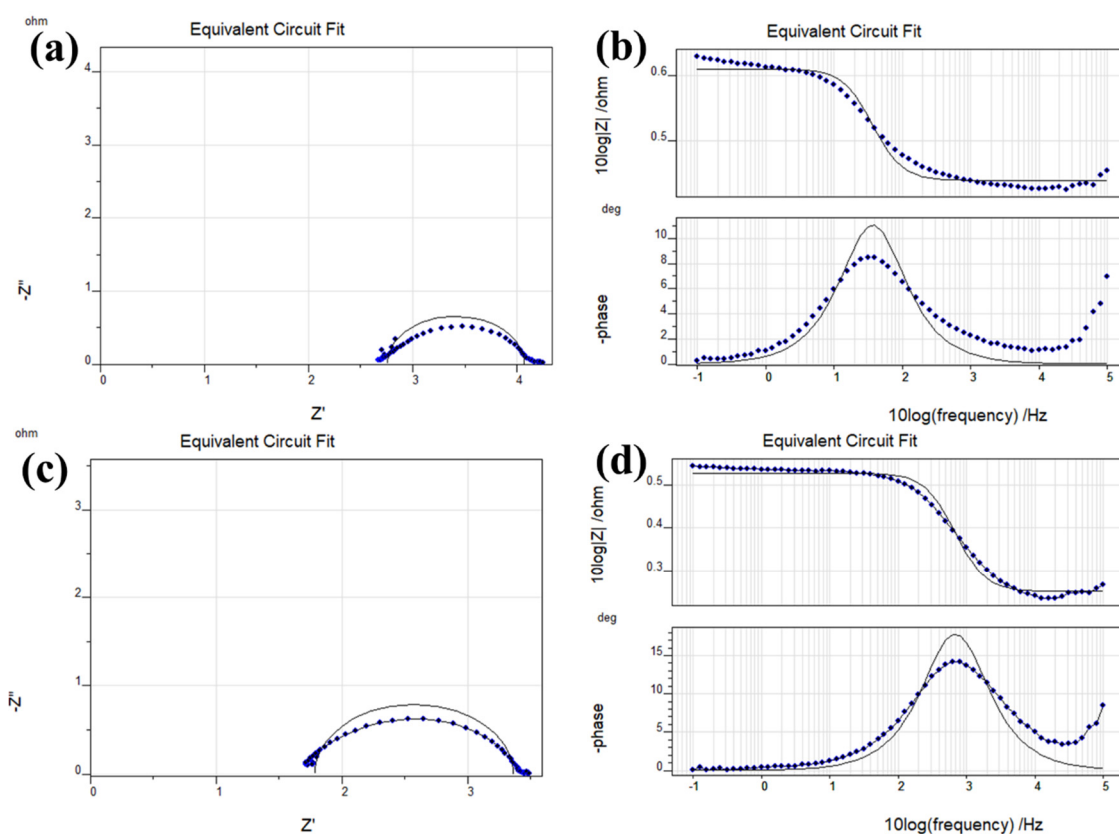

**Figure S7.** Z-fitting results with the equivalent circuit and Bode impedance plots for (a, b) HEA8 and (c, d) Pt/C.

**Table S5.** Fitted data from the Nyquist plots at an overpotential of 300 mV.

| Catalyst | $R_1$ ( $\Omega$ ) | $R_2$ ( $\Omega$ ) | $C_1$ (F) |
|----------|--------------------|--------------------|-----------|
| HEA8     | 2.757              | 1.312              | 0.00398   |
| Pt/C     | 1.786              | 1.578              | 0.0002022 |



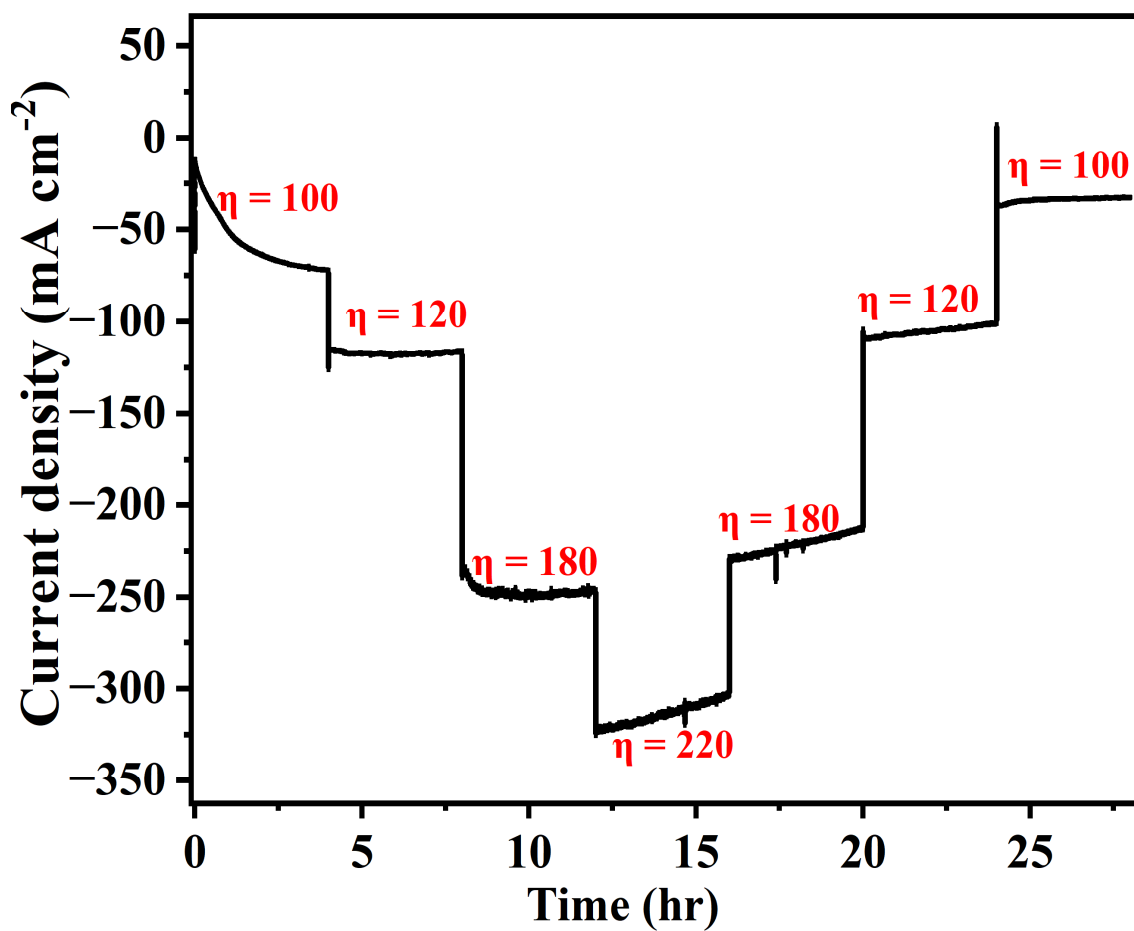

Figure S8. Chronoamperometry study of HEA8 at different potentials during the HER.

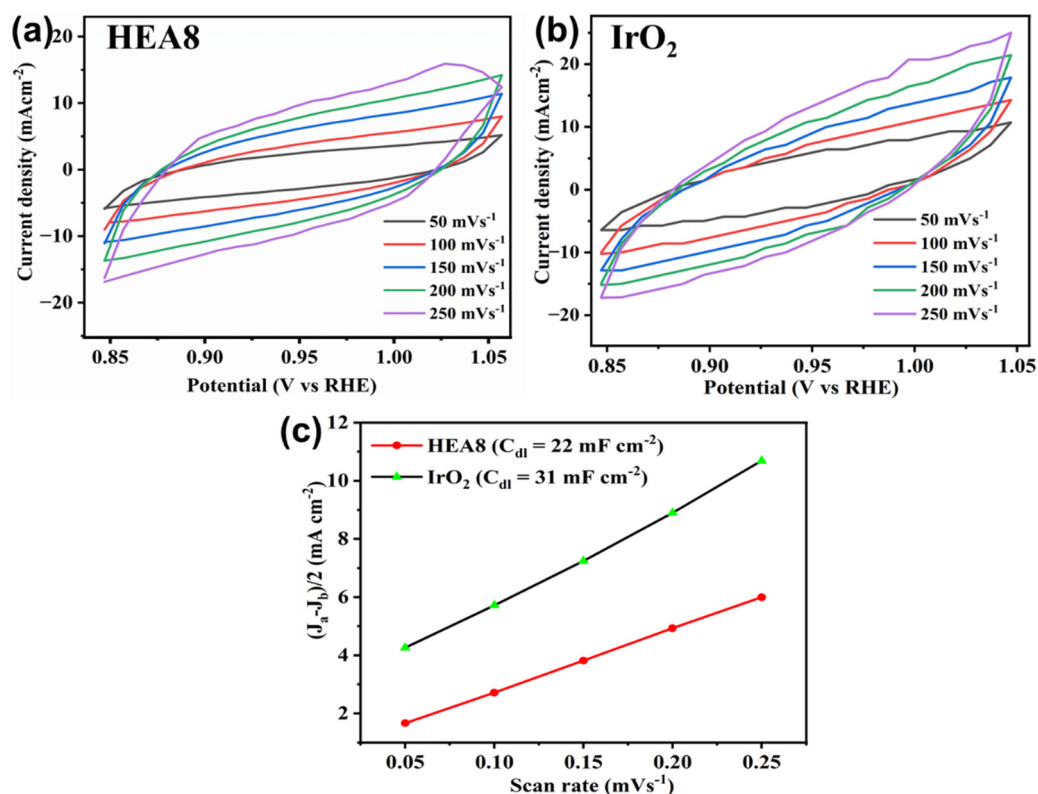

**Figure S9.** Cyclic voltammograms and ECSA of HEA8 and IrO<sub>2</sub> for the oxygen evolution reaction (OER).

**Table S6.** Tafel slope ( $b$ ), intercept ( $a$ ), and exchange current density ( $j_0$ ) related to the OER catalyzed by different materials.

| Electrocatalyst  | Steady-state region |                             |                              |
|------------------|---------------------|-----------------------------|------------------------------|
|                  | $a$                 | $b$ (mV dec <sup>-1</sup> ) | $j_0$ (mA cm <sup>-2</sup> ) |
| HEA8             | 0.084               | 89.2                        | 0.199                        |
| IrO <sub>2</sub> | 0.130               | 52.7                        | 0.063                        |

**Table S7.** Calculated double-layer capacitance ( $C_{dl}$ ), ECSA, and roughness factor (RF).

| Catalyst         | $C_{dl}$ (mF cm <sup>-2</sup> ) | ECSA (cm <sup>2</sup> ) | RF       |
|------------------|---------------------------------|-------------------------|----------|
| HEA8             | 22                              | 628.57                  | 15714.25 |
| IrO <sub>2</sub> | 31                              | 885.71                  | 22142.75 |

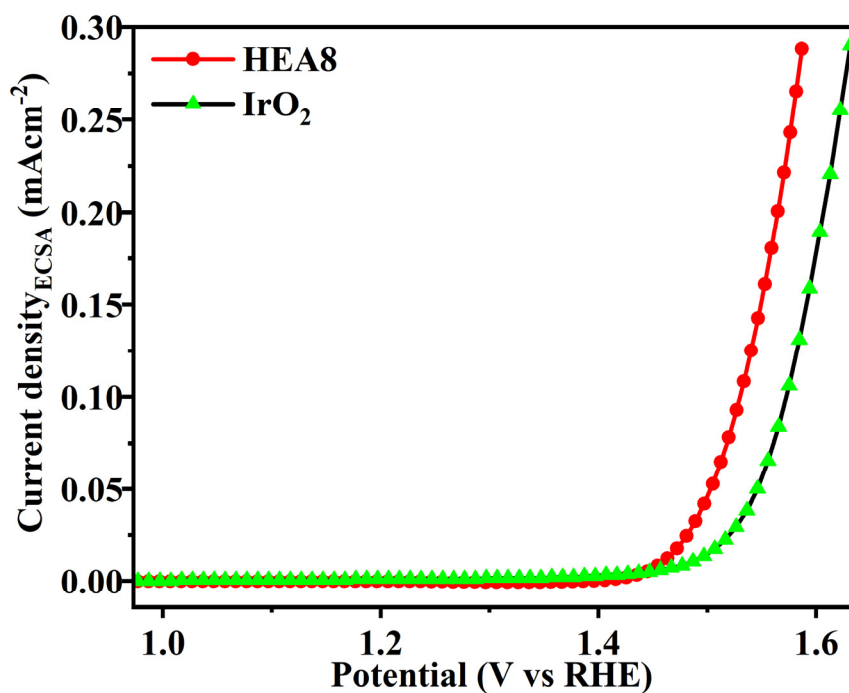

**Figure S10.** ECSA-normalized linear sweep voltammograms of HEA8 and IrO<sub>2</sub>.

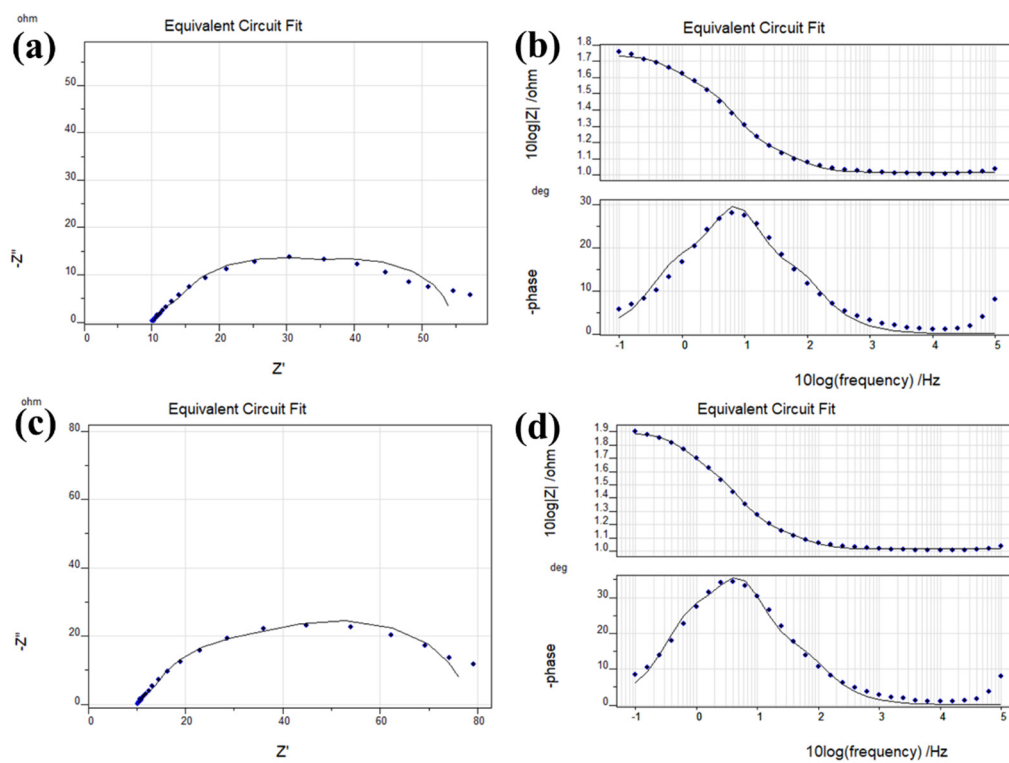

**Figure S11.** Z-fitting results with the equivalent circuit and Bode impedance plots for (a, b) HEA8 and (c, d) IrO<sub>2</sub>.

**Table S8.** Fitted data from the Nyquist plots at an overpotential of 300 mV.

| Catalyst         | $R_1$ ( $\Omega$ ) | $R_2$ ( $\Omega$ ) | $R_3$ ( $\Omega$ ) | $C_1$ (F) | $C_2$ (F)      |
|------------------|--------------------|--------------------|--------------------|-----------|----------------|
| HEA8             | 10.24              | 0.001290           | 49.31              | 0.001299  | 0.000000009023 |
| IrO <sub>2</sub> | 9.93               | 1.15               | 75.40              | 0.001730  | 0.0000001236   |

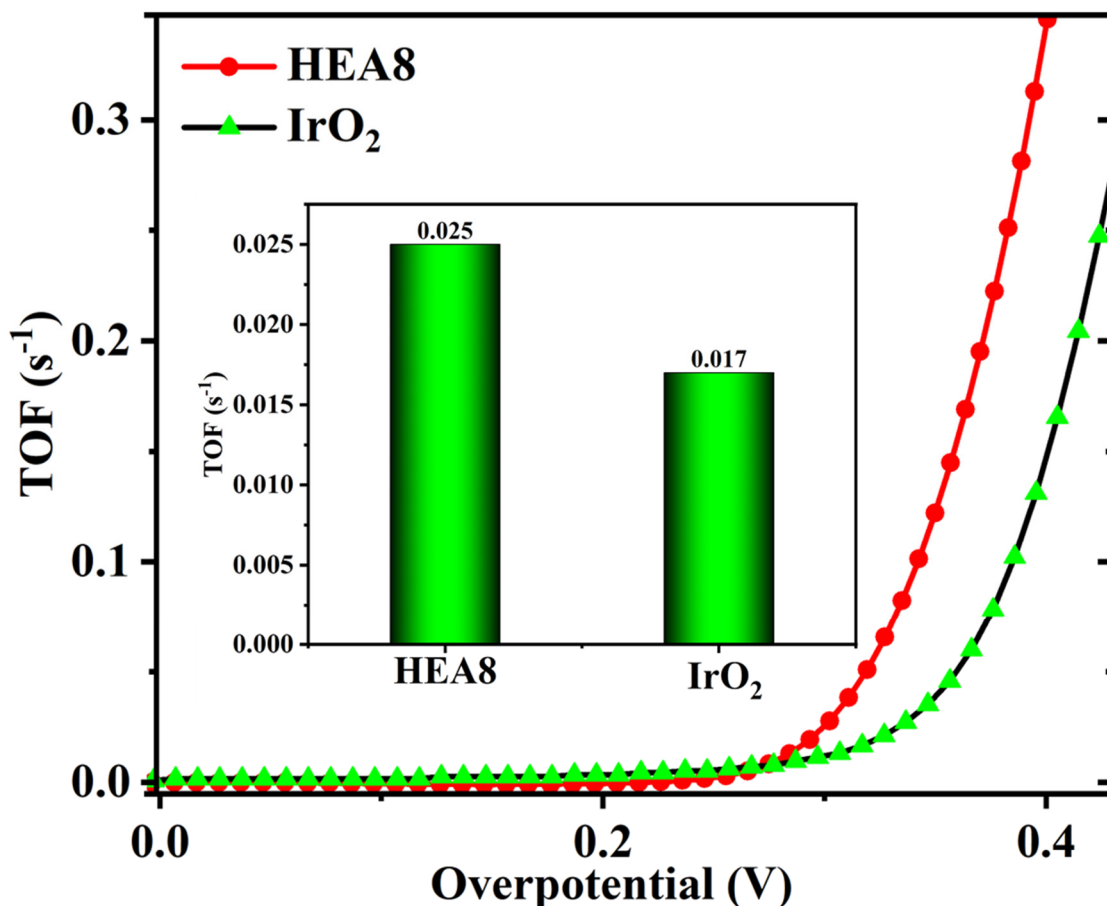

**Figure S12.** TOFs for the OER electrocatalysts (inset: comparison of TOFs for HEA8 and IrO<sub>2</sub> at an overpotential of 300 mV).

#### TOF calculation for the OER

The method proposed by Jaramillo et al. was adopted for calculating the TOF.<sup>13,14</sup> The TOF was determined using the following equation:

$$\text{TOF per site} = \# \times J \times A/N \times A$$

where # represents the number of hydrogen turnover events,  $J$  is the current density at an applied overpotential,  $A$  is the geometric area of the catalyst, and  $N$  is the number of active

sites per unit area. The total number of oxygen turnovers ( $\#O_2$ ) was calculated from the current density using the following equation:

$$\#O_2 = (j \text{ mA cm}^{-2}) \times (1 \text{ C s}^{-1}/1000 \text{ mA}) \times (1 \text{ mol e}^{-1}/96485 \text{ C}) \times (1 \text{ mol O}_2/4 \text{ mol e}^{-1}) \times (6.023 \times 10^{23} \text{ molecules O}_2/1 \text{ mol O}_2) = 1.56 \times 10^{15} \text{ O}_2 \text{ s}^{-1} \text{ cm}^{-2} \text{ per mA cm}^{-2}$$

In this work,  $\#$  is  $1.56 \times 10^{15} \text{ s}^{-1} \text{ cm}^{-2}$  per  $\text{mA cm}^{-2}$ , and  $A$  is  $0.04 \text{ cm}^2$ , corresponding to the geometric area of the catalyst. The surface site density of all materials is reasonably approximated to be  $10^{15} \text{ cm}^{-2}$ . Therefore,  $N$  can be calculated using the formula  $N = C_{dl}/C_s \times 10^{15} \text{ cm}^{-2}$ , where  $C_{dl}$  and  $C_s$  represent the double-layer and specific capacitance, respectively. For this calculation, a general  $C_s$  value of  $0.035 \text{ mF cm}^{-2}$  was used.

**Table S9.** Recently reported electrocatalyst activities for the OER in acidic media.

| Electrocatalyst                                                                                                        | Overpotential ( $\eta_{10}$ ) | Tafel Slope (mV dec <sup>-1</sup> ) | Ref.      |
|------------------------------------------------------------------------------------------------------------------------|-------------------------------|-------------------------------------|-----------|
| Ir/Fe <sub>4</sub> N                                                                                                   | 316                           | 61.5                                | 15        |
| Ir/Co <sub>4</sub> N                                                                                                   | 319                           | 66.9                                | 15        |
| Ir/Ni <sub>4</sub> N                                                                                                   | 346                           | 64                                  | 15        |
| RuO <sub>2</sub> /Co <sub>3</sub> O <sub>4</sub> -RuCo@NC                                                              | 247                           | 89                                  | 16        |
| Y <sub>1.85</sub> Zn <sub>0.15</sub> Ru <sub>2</sub> O <sub>7-<math>\delta</math></sub>                                | 290                           | 36.9                                | 17        |
| Co <sub>0.05</sub> Fe <sub>0.95</sub> O <sub>y</sub>                                                                   | 650                           | 110                                 | 18        |
| SrTi <sub>0.67</sub> Ir <sub>0.33</sub> O <sub>3</sub>                                                                 | 247                           | 43                                  | 19        |
| Sr <sub>0.90</sub> Na <sub>0.10</sub> RuO <sub>3</sub>                                                                 | 170                           | 40                                  | 20        |
| IrCo alloy                                                                                                             | 270                           | 71.8                                | 21        |
| Ru <sub>1</sub> -Pt <sub>3</sub> Cu                                                                                    | 220                           |                                     | 22        |
| Ir <sub>0.2</sub> Ni <sub>0.34</sub> Co <sub>0.46</sub> O <sub><math>\delta</math></sub>                               | 280                           | 40.4                                | 23        |
| np-Ir <sub>70</sub> Ni <sub>15</sub> Co <sub>15</sub>                                                                  | 220                           | 44.1                                | 24        |
| Ta <sub>0.1</sub> Tm <sub>0.1</sub> Ir <sub>0.8</sub> O <sub>2-<math>\delta</math></sub>                               | 226                           | 64                                  | 25        |
| Ho <sub>2</sub> Ru <sub>2</sub> O <sub>7</sub>                                                                         | 280                           | 36.86                               | 26        |
| Ru/MnO <sub>2</sub>                                                                                                    | 161                           | 29.4                                | 27        |
| IrO <sub>2</sub> -Ta <sub>2</sub> O <sub>5</sub>                                                                       | 240                           | 51.9                                | 28        |
| Pt-doped IrNi                                                                                                          | 308                           | 45                                  | 29        |
| (Na <sub>0.33</sub> Ce <sub>0.67</sub> ) <sub>2</sub> -Ir <sub>1-x</sub> Ru <sub>x</sub> ) <sub>2</sub> O <sub>7</sub> | 190                           |                                     | 30        |
| HEA8                                                                                                                   | 230                           | 89.2                                | This work |

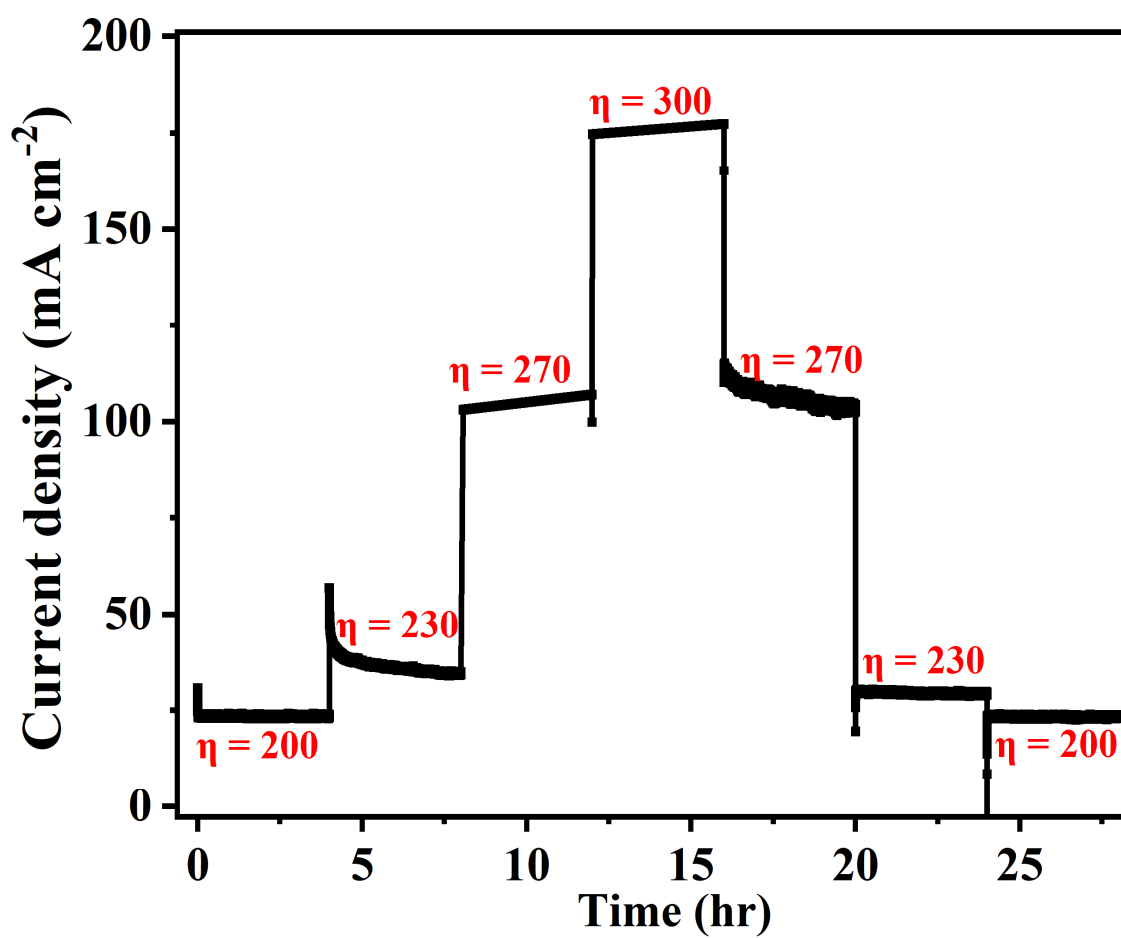

Figure S13. Chronoamperometry study of HEA8 at different potentials during the OER.

**Table S10.** Recently reported high-entropy alloy-based electrocatalysts for overall water splitting in acidic media.

| Electrocatalyst                                                          | Electrolyte                           | Potential @ geometric current density | Loading                                             | Durability                       | Ref.      |
|--------------------------------------------------------------------------|---------------------------------------|---------------------------------------|-----------------------------------------------------|----------------------------------|-----------|
| RuIr-NC  RuIr-NC                                                         | 0.05 M H <sub>2</sub> SO <sub>4</sub> | 1.485 V @ 10 mA cm <sup>-2</sup>      | 0.15 mg cm <sup>-2</sup>                            | 120 h @ 10 mA cm <sup>-2</sup>   | 31        |
| Co-RuIr  Co-RuIr                                                         | 0.1 M HClO <sub>4</sub>               | 1.52 V @ 10 mA cm <sup>-2</sup>       | -                                                   | 25 h @ 10 mA cm <sup>-2</sup>    | 32        |
| Ru-Te nanorods   Ru-Te nanorods                                          | 0.5 M H <sub>2</sub> SO <sub>4</sub>  | 1.52 V @ 10 mA cm <sup>-2</sup>       | -                                                   | 24 h @ 5 mA cm <sup>-2</sup>     | 33        |
| ONPPGC/GC  ONPPGC/GC                                                     | 0.5 M H <sub>2</sub> SO <sub>4</sub>  | 1.75 V @ 10 mA cm <sup>-2</sup>       | -                                                   | 10 h @ 5 mA cm <sup>-2</sup>     | 34        |
| Ir-A@Fe@N CNT   IrSA@Fe@N CNT                                            | 0.5 M H <sub>2</sub> SO <sub>4</sub>  | 1.51 V @ 10 mA cm <sup>-2</sup>       | 0.00114 mg <sub>Ir</sub> cm <sup>-2</sup>           | 12 h @ 10 mA cm <sup>-2</sup>    | 35        |
| Co-MoS <sub>2</sub>   Co-MoS <sub>2</sub>                                | 0.5 M H <sub>2</sub> SO <sub>4</sub>  | 1.90 V @ 10 mA cm <sup>-2</sup>       | -                                                   | -                                | 36        |
| IrO <sub>2</sub>   M-CoSe <sub>1.28</sub> S <sub>0.72</sub>              | 0.5 M H <sub>2</sub> SO <sub>4</sub>  | 1.79 V @ 1 mA cm <sup>-2</sup>        | 3 and 1 mg per cm <sup>2</sup> in anode and cathode | 416 h @ 1 A cm <sup>-2</sup>     | 12        |
| IrO <sub>2</sub>   Ni <sub>96</sub> W <sub>4</sub> /Cu                   | 0.5 M H <sub>2</sub> SO <sub>4</sub>  | 1.88 V @ 1 mA cm <sup>-2</sup>        |                                                     | -                                | 37        |
| Ir  Mo <sub>3</sub> S <sub>13</sub> -NCNT                                | 0.5 M H <sub>2</sub> SO <sub>4</sub>  | 1.92 V @ 1 mA cm <sup>-2</sup>        | 1.5 and 3 mg cm <sup>-2</sup> in anode and cathode  | 1700 h @ 1.86 A cm <sup>-2</sup> | 38        |
| IrO <sub>2</sub>   Cu <sub>44.4</sub> Ni <sub>46</sub> Mo <sub>9.6</sub> | 0.5 M H <sub>2</sub> SO <sub>4</sub>  | 1.8 V @ 1 mA cm <sup>-2</sup>         | 1.5 and 3 mg cm <sup>-2</sup> in anode and cathode  | 48 h @ 1 A cm <sup>-2</sup>      | 39        |
| HEA8  HEA8                                                               | 0.5 M H <sub>2</sub> SO <sub>4</sub>  | 1.51 V @ 10 mA cm <sup>-2</sup>       | 0.25 mg cm <sup>-2</sup>                            | 30 h @ 55 mA cm <sup>-2</sup>    | This work |

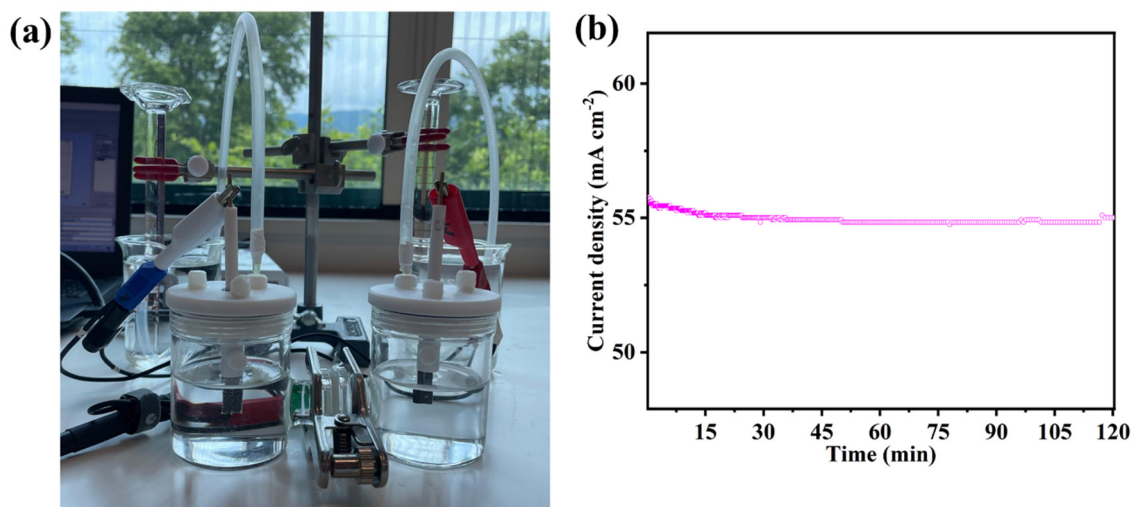

**Figure S14.** (a) Experimental setup for the Faradaic efficiency calculation of HEA8 for overall water splitting. (b) Chronoamperometric curve of HEA8||HEA8 obtained at 2 V.

### Faradaic efficiency (FE) of overall water splitting catalyzed by HEA8

The FE of HEA8 in an acidic medium was calculated at an applied voltage of 2 V. The bifunctional electrocatalysts achieved a current density of 55 mA cm<sup>-2</sup> at 2 V, with a geometric area of 0.18 cm<sup>2</sup> for the carbon cloth. The number of charges passed per second at the applied voltage equals (0.055 A × 0.18 cm<sup>2</sup> × 1 s) Coulombs, and the number of electrons passed per second equals (0.055 A × 0.18 cm<sup>2</sup> × 1 s)/96485 mol.

For the HER, since the transfer of two electrons is associated with the evolution of one H<sub>2</sub> molecule, the amount of H<sub>2</sub> produced per second due to the passage of electrons equals ((0.055 × 0.18 × 1)/(96485 × 2)) mol. At standard temperature and pressure, where the volume of 1 mol of gas is 22400 mL, the amount of H<sub>2</sub> produced per second is ((0.055 × 0.18 × 1 × 22400 mL)/(96485 × 2)) mL = 0.001149 mL.

For the OER, since the transfer of 4 electrons is associated with the evolution of one O<sub>2</sub> molecule, the amount of O<sub>2</sub> produced per second is ((0.055 × 0.18 × 1)/(96485 × 4)) mol. Thus, the volume of O<sub>2</sub> produced per second is ((0.055 × 0.18 × 1 × 22400 mL)/(96485 × 4)) mL = 0.00057459 mL.

Finally, the FE of the water splitting process was calculated using the following equation:

$$FE = (\text{Amount of gas practically evolved} \times 100) / \text{Theoretically calculated amount of gas}$$



**Table S11.** FE calculation of HEA8.

| Time (min) | O <sub>2</sub> gas evolution (mL) |              | FE (%) | H <sub>2</sub> gas evolution (mL) |              | FE (%) |
|------------|-----------------------------------|--------------|--------|-----------------------------------|--------------|--------|
|            | Theoretical                       | Experimental |        | Theoretical                       | Experimental |        |
| 20         | 0.7                               | 0.708        | 98.80  | 1.5                               | 1.51         | 99.30  |
| 40         | 1.5                               | 1.52         | 98.68  | 2.8                               | 3.02         | 93.02  |
| 60         | 2                                 | 2.21         | 95.23  | 4.2                               | 4.29         | 97.90  |
| 80         | 2.7                               | 2.72         | 92.59  | 5.5                               | 5.59         | 98.92  |
| 100        | 3.5                               | 3.53         | 96.41  | 6.5                               | 6.98         | 93.12  |
| 120        | 4                                 | 4.23         | 95.20  | 8.7                               | 8.79         | 97.81  |

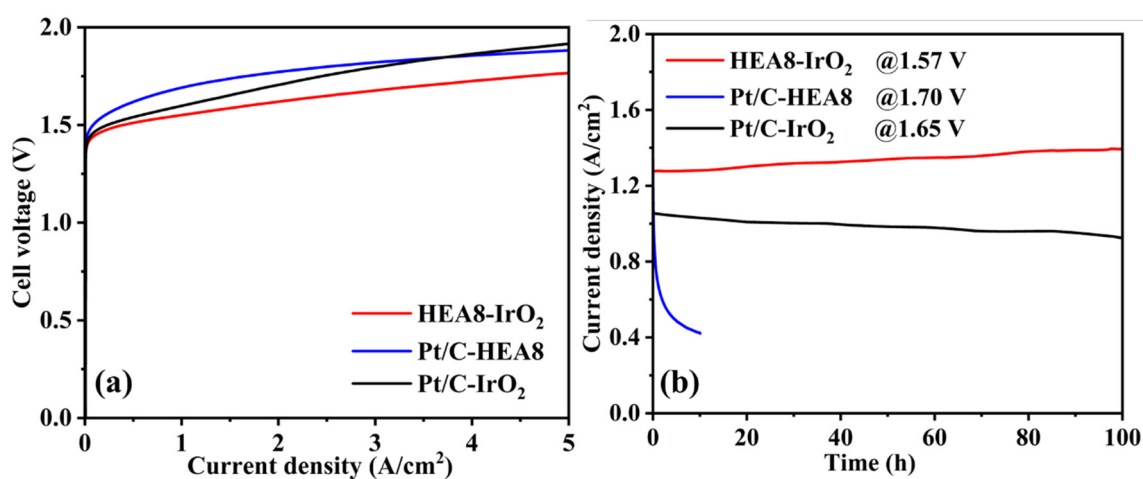

**Figure S15.** Performance of HEA8 in single-cell PEM water electrolyzer. (a) Current–density ( $I$ – $V$ ) polarization curves for HEA8||IrO<sub>2</sub>, Pt/C||HEA8, and Pt/C||IrO<sub>2</sub> after cell activation. (b) Chronoamperometry curves of HEA8||IrO<sub>2</sub>, Pt/C||HEA8, and Pt/C||IrO<sub>2</sub> at cell voltages of 1.57, 1.70, and 1.65 V, respectively.

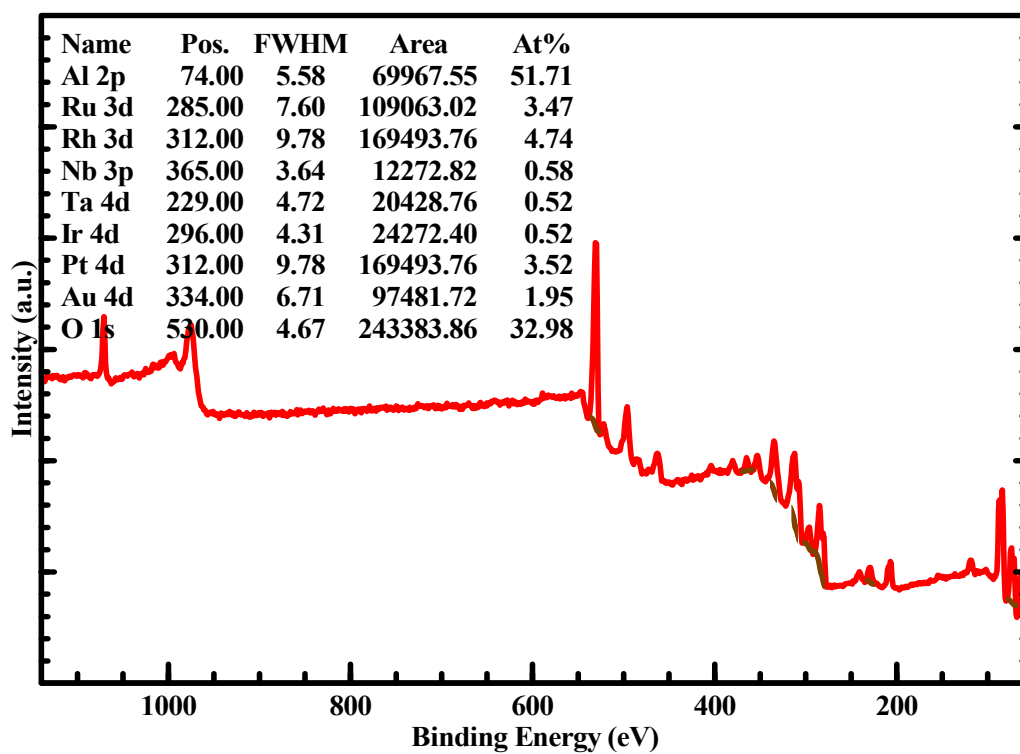

Figure S16. XPS survey spectrum of HEA8.

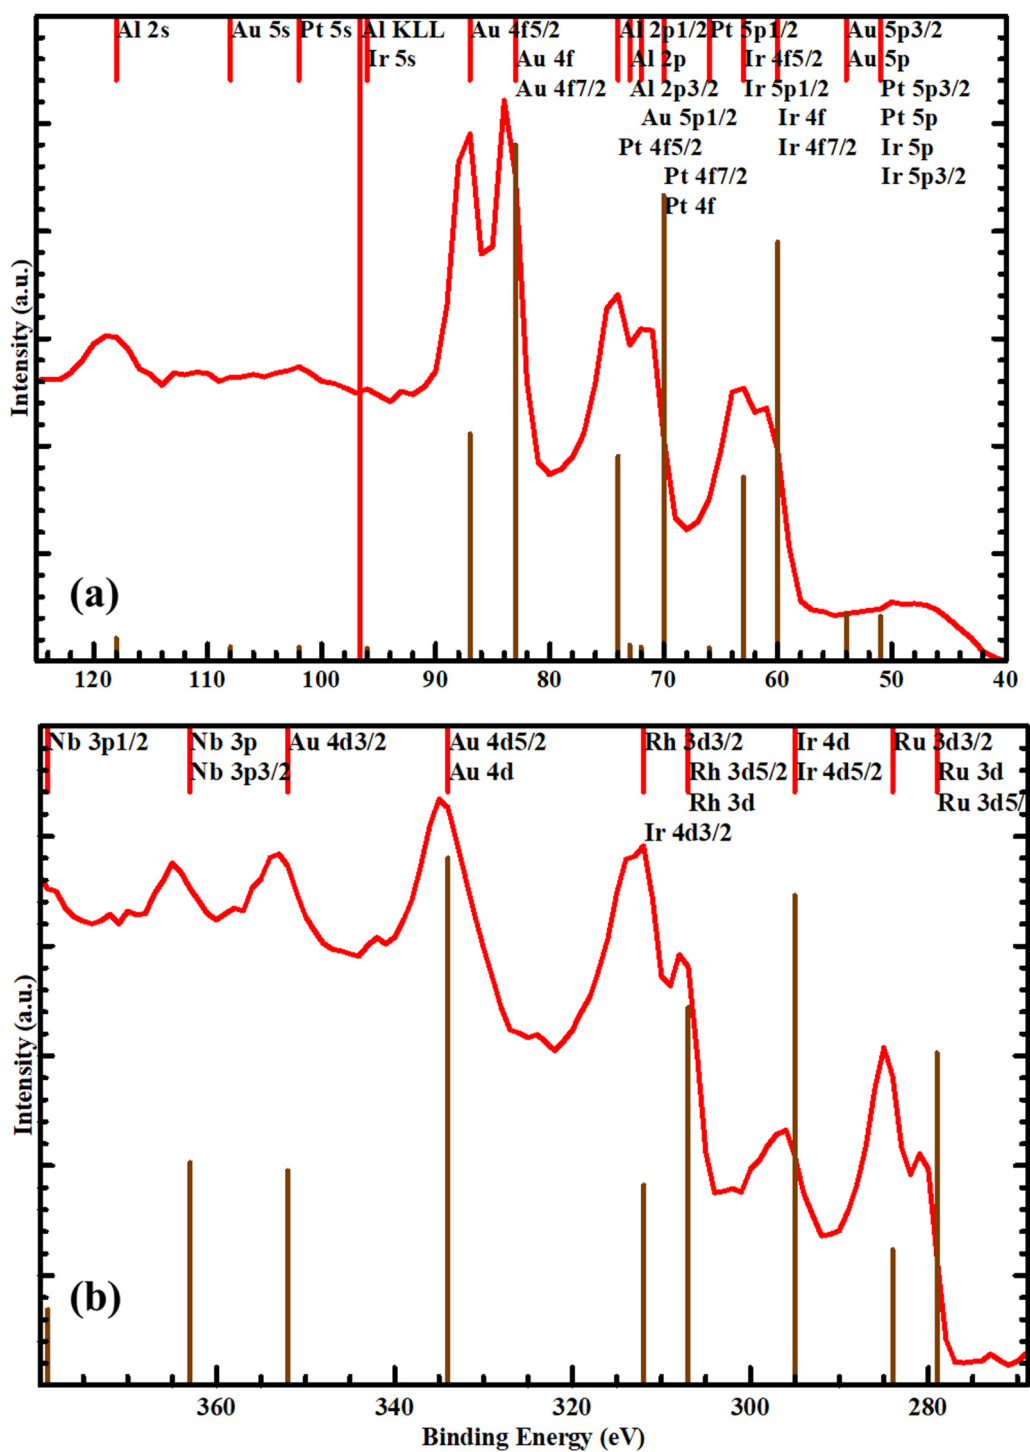

**Figure S17.** Core-level XPS spectra of HEA8 in the range of (a) 40–125 eV and (b) 270–380 eV, showing the 4f orbitals of Al, Ir, Pt, and Au, and the 3d orbitals of Ru, Rh, and Pt, respectively. The binding energies of each peak are shown in the figure.

## References

- 1 I. S. Kwon, I. H. Kwak, G. M. Zewdie, S. J. Lee, J. Y. Kim, S. J. Yoo, J. G. Kim, J. Park and H. S. Kang, *Adv. Mater.*, 2022, **34**, e2205524.
- 2 I. H. Kwak, I. S. Kwon, G. M. Zewdie, T. T. Debela, S. J. Lee, J. Y. Kim, S. J. Yoo, J. G. Kim, J. Park and H. S. Kang, *ACS Nano*, 2022, **16**, 4278.
- 3 J. Deng, H. B. Li, J. P. Xiao, Y. C. Tu, D. H. Deng, H. X. Yang, H. F. Tian, J. Q. Li, P. J. Ren and X. H. Bao, *Energy Environ. Sci.*, 2015, **8**, 1594.
- 4 L. H. Zhang, L. L. Han, H. X. Liu, X. J. Liu and J. Luo, *Angew. Chem. Int. Ed.*, 2017, **56**, 13694.
- 5 N. C. Cheng, S. Stambula, D. Wang, M. N. Banis, J. Liu, A. Riese, B. W. Xiao, R. Y. Li, T. K. Sham, L. M. Liu, G. A. Botton and X. L. Sun, *Nat. Commun.*, 2016, **7**, 13638.
- 6 J. Q. Zhang, Y. F. Zhao, X. Guo, C. Chen, C. L. Dong, R. S. Liu, C. P. Han, Y. D. Li, Y. Gogotsi and G. X. Wang, *Nat. Catal.*, 2018, **1**, 985.
- 7 K. Jiang, B. Y. Liu, M. Luo, S. C. Ning, M. Peng, Y. Zhao, Y. R. Lu, T. S. Chan, F. M. F. de Groot and Y. W. Tan, *Nat. Commun.*, 2019, **10**, 1743.
- 8 Z. Jia, K. Nomoto, Q. Wang, C. Kong, L. G. Sun, L. C. Zhang, S. X. Liang, J. Lu and J. J. Kruzic, *Adv. Funct. Mater.*, 2021, **31**, 2101586.
- 9 H. Y. Jin, S. Sultan, M. R. Ha, J. N. Tiwari, M. G. Kim and K. S. Kim, *Adv. Funct. Mater.*, 2020, **30**, 2000531.
- 10 H. H. Wei, K. Huang, D. Wang, R. Y. Zhang, B. H. Ge, J. Y. Ma, B. Wen, S. Zhang, Q. Y. Li, M. Lei, C. Zhang, J. Irawan, L. M. Liu and H. Wu, *Nat. Commun.*, 2017, **8**, 1490.
- 11 Y. C. Yao, X. K. Gu, D. S. He, Z. J. Li, W. Liu, Q. Xu, T. Yao, Y. Lin, H. J. Wang, C. M. Zhao, X. Q. Wang, P. Q. Yin, H. Li, X. Hong, S. Q. Wei, W. X. Li, Y. D. Li and Y. Wu, *J. Am. Chem. Soc.*, 2019, **141**, 19964.
- 12 X.-L. Zhang, P.-C. Yu, X.-Z. Su, S.-J. Hu, L. Shi, Y.-H. Wang, P.-P. Yang, F.-Y. Gao, Z.-Z. Wu, L.-P. Chi, Y.-R. Zheng and M.-R. Gao, *Sci. Adv.*, 2023, **9**, eadh2885.
- 13 J. D. Benck, Z. Chen, L. Y. Kuritzky, A. J. Forman and T. F. Jaramillo, *ACS Catal.*, 2012, **2**, 1916.
- 14 Z. W. Chen, J. Li, P. Ou, J. E. Huang, Z. Wen, L. X. Chen, X. Yao, G. Cai, C. C. Yang, C. V. Singh and Q. Jiang, *Nat. Commun.*, 2024, **15**, 359.
- 15 B. M. Tackett, W. Sheng, S. Kattel, S. Yao, B. Yan, K. A. Kuttiyiel, Q. Wu and J. G. Chen, *ACS Catal.*, 2018, **8**, 2615.
- 16 Z. Fan, J. Jiang, L. Ai, Z. Shao and S. Liu, *ACS Appl. Mater. Interfaces*, 2019, **11**, 47894.
- 17 Q. Feng, Q. Wang, Z. Zhang, Y. Xiong, H. Li, Y. Yao, X.-Z. Yuan, M. C. Williams, M. Gu, H. Chen, H. Li and H. Wang, *Appl. Catal. B*, 2019, **244**, 494.
- 18 W. L. Kwong, C. C. Lee, A. Shchukarev and J. Messinger, *Chem. Commun.*, 2019, **55**, 5017.

- 19 X. Liang, L. Shi, Y. Liu, H. Chen, R. Si, W. Yan, Q. Zhang, G.-D. Li, L. Yang and X. Zou, *Angew. Chem. Int. Ed.*, 2019, **58**, 7631.
- 20 M. Retuerto, L. Pascual, F. Calle-Vallejo, P. Ferrer, D. Gianolio, A. G. Pereira, Á. García, J. Torrero, M. T. Fernández-Díaz, P. Bencok, M. A. Peña, J. L. G. Fierro and S. Rojas, *Nat. Commun.*, 2019, **10**, 2041.
- 21 X. Sun, F. Liu, X. Chen, C. Li, J. Yu and M. Pan, *Electrochim. Acta*, 2019, **307**, 206.
- 22 Y. Yao, S. Hu, W. Chen, Z.-Q. Huang, W. Wei, T. Yao, R. Liu, K. Zang, X. Wang, G. Wu, W. Yuan, T. Yuan, B. Zhu, W. Liu, Z. Li, D. He, Z. Xue, Y. Wang, X. Zheng, J. Dong, C.-R. Chang, Y. Chen, X. Hong, J. Luo, S. Wei, W.-X. Li, P. Strasser, Y. Wu and Y. Li, *Nat. Catal.*, 2019, **2**, 304.
- 23 W. Q. Zaman, W. Sun, M. Tariq, Z. Zhou, U. Farooq, Z. Abbas, L. Cao and J. Yang, *Appl. Catal. B*, 2019, **244**, 295.
- 24 Y. Zhao, M. Luo, S. Chu, M. Peng, B. Liu, Q. Wu, P. Liu, F. M. F. de Groot and Y. Tan, *Nano Energy*, 2019, **59**, 146.
- 25 S. Hao, H. Sheng, M. Liu, J. Huang, G. Zheng, F. Zhang, X. Liu, Z. Su, J. Hu, Y. Qian, L. Zhou, Y. He, B. Song, L. Lei, X. Zhang and S. Jin, *Nat. Nanotechnol.*, 2021, **16**, 1371.
- 26 J. Yan, J. Zhu, D. Chen, S. Liu, X. Zhang, S. Yu, Z. Zeng, L. Jiang and F. Du, *J. Mater. Chem. A*, 2022, **10**, 9419.
- 27 C. Lin, J.-L. Li, X. Li, S. Yang, W. Luo, Y. Zhang, S.-H. Kim, D.-H. Kim, S. S. Shinde, Y.-F. Li, Z.-P. Liu, Z. Jiang and J.-H. Lee, *Nat. Catal.*, 2021, **4**, 1012.
- 28 Y. Furusho and F. Amano, *Electrochemistry*, 2021, **89**, 234.
- 29 J. S. Choi, A. S. T. Smith, N. P. Williams, T. Matsubara, M. Choi, J. W. Kim, H. J. Kim, S. Choi and D. H. Kim, *Adv. Funct. Mater.*, 2020, **30**, 2003935.
- 30 K. Sardar, E. Petrucco, C. I. Hiley, J. D. B. Sharman, P. P. Wells, A. E. Russell, R. J. Kashtiban, J. Sloan and R. I. Walton, *Angew. Chem. Int. Ed.*, 2014, **53**, 10960.
- 31 D. Wu, K. Kusada, S. Yoshioka, T. Yamamoto, T. Toriyama, S. Matsumura, Y. Chen, O. Seo, J. Kim, C. Song, S. Hiroi, O. Sakata, T. Ina, S. Kawaguchi, Y. Kubota, H. Kobayashi and H. Kitagawa, *Nat. Commun.*, 2021, **12**, 1145.
- 32 J. Shan, T. Ling, K. Davey, Y. Zheng and S. Z. Qiao, *Adv. Mater.*, 2019, **31**, 1900510.
- 33 J. Wang, L. Han, B. Huang, Q. Shao, H. L. Xin and X. Huang, *Nat. Commun.*, 2019, **10**, 5692.
- 34 S. L. J. Lai, F. Wu, M. Saqib, R. Luque and G. Xu, *Energy Environ. Sci.*, 2016, **9**, 1210.
- 35 F. Luo, H. Hu, X. Zhao, Z. Yang, Q. Zhang, J. Xu, T. Kaneko, Y. Yoshida, C. Zhu and W. Cai, *Nano Lett.*, 2020, **20**, 2120.
- 36 Q. Xiong, X. Zhang, H. Wang, G. Liu, G. Wang, H. Zhang and H. Zhao, *Chem. Commun.*, 2018, **54**, 3859.
- 37 H. Kim, H. Park, D. K. Kim, S. H. Oh, I. Choi and S. K. Kim, *ACS Sustainable Chem. Eng.*, 2019, **7**, 8265.

- 38 P. K. R. Holzapfel, M. Bühler, D. Escalera-López, M. Bierling, F. D. Speck, K. J. J. Mayrhofer, S. Cherevko, C. V. Pham and S. Thiele, *Small*, 2020, **16**, 2003161.
- 39 K. J. Choi, H. Kim and S.-K. Kim, *J. Power Sources*, 2021, **506**, 230200.
